# Supplementary material
Source: PubMed Central journal article supplement (PMC5687886)
Supplement: NIHMS910537-supplement-1.pdf [file NIHMS910537-supplement-1.pdf]

## **List of Supplemental Material**

Figures S1-S7

Table S1 (see Excel file)

Tables S2-S4

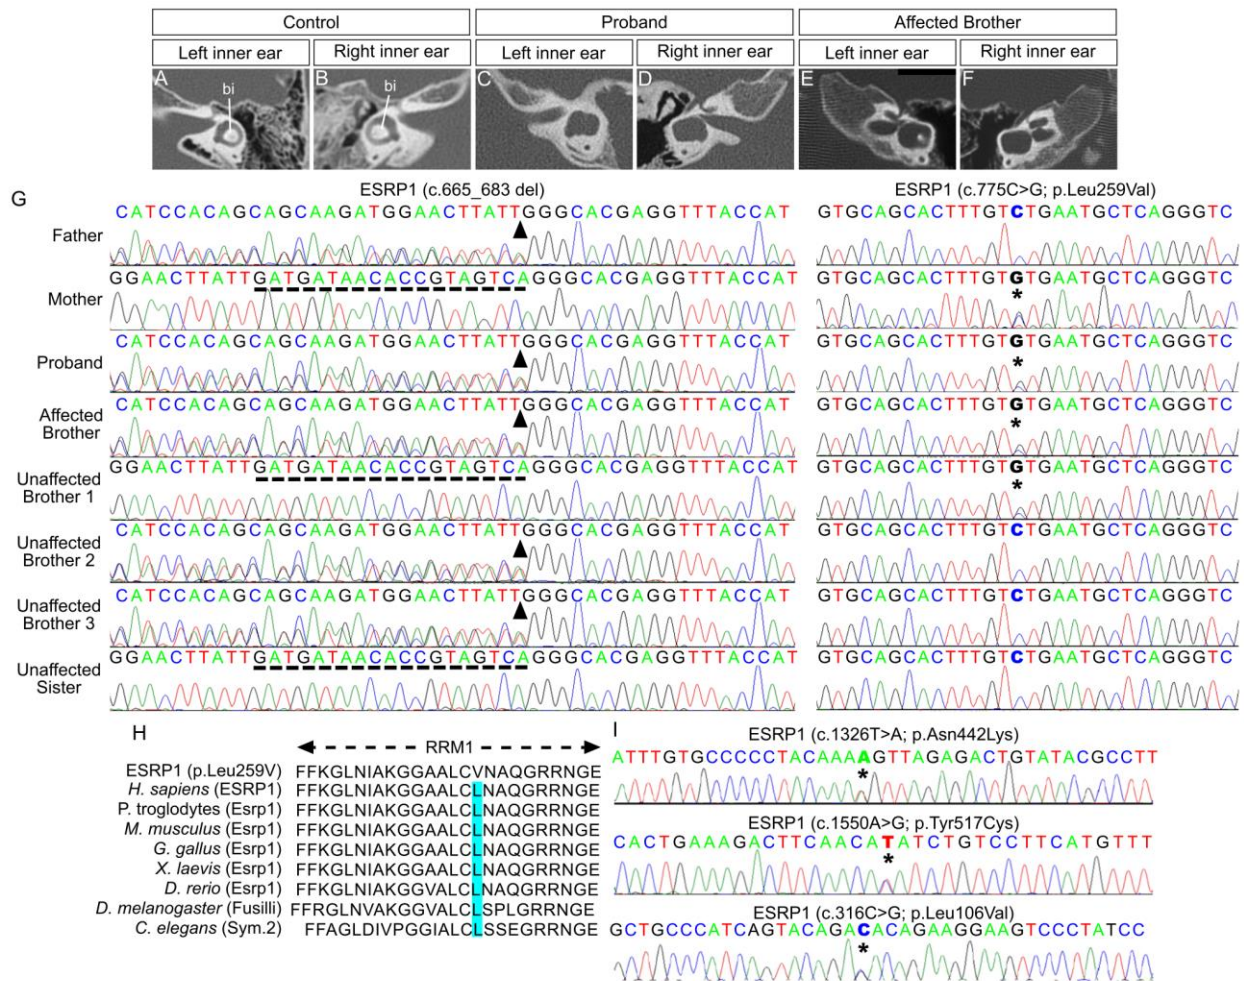

**Figure S1. (Related to Figure 1) *ESRP1* mutations in individuals with SNHL. (A-F)** Axial CT scans of the lateral vestibule from control and affected children in pedigree with SNHL showing absence of bony island (bi) in (C-F). (G) Sanger sequencing tracks of *ESRP1* from individuals in pedigree with SNHL showing position of paternally inherited 19 bp deletion (arrowhead) corresponding to underlined sequence, and maternally inherited point mutation (asterisk). (H) Cross-species comparison of the first RNA recognition motif (RRM) in *ESRP1* showing amino acid conservation at site of *ESRP1* mutation (Leu259Val). (I) Sanger sequencing tracks of *ESRP1* from three isolated cases of SNHL showing position of point mutations (asterisk).

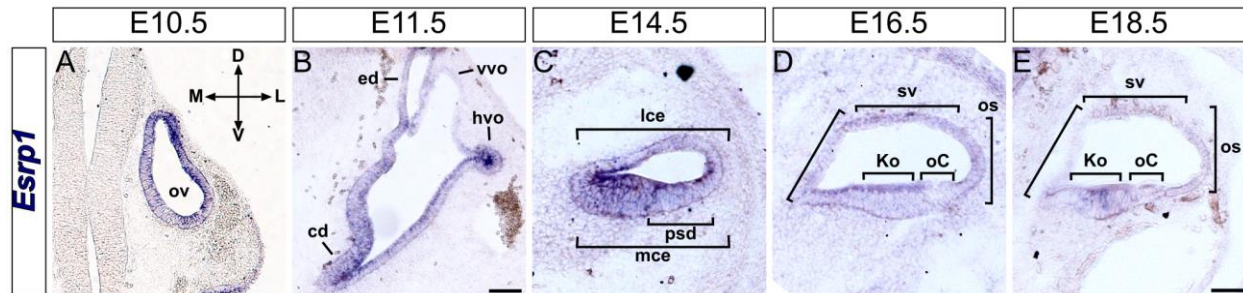

**Figure S2. (Related to Figures 1 and 2) *Esrp1* expression in the developing mouse cochlea.** (A-E) Transverse sections through the otic vesicle (A,B) and cochlear duct (C-E) of wild type embryos over several developmental stages showing broad *Esrp1* expression in the otic epithelium. Scale bar = 100 $\mu$ m (A,B) and 50 $\mu$ m (C-E). Abbreviations: cochlear duct (cd), dorsal (D), endolymphatic duct (ed), horizontal vestibular outpouch (hvo), Kolliker's organ (Ko), lateral (L), lateral cochlear epithelium (lce), medial (M), medial cochlear epithelium (mce), neural tube (nt), periotic mesenchyme (pom), prosensory domain (psd), organ of Corti (oC), otic vesicle (ov), outer sulcus (os), Reissner's membrane (Rm), stria vascularis (sv), ventral (V), vertical vestibular outpouch (vvo).

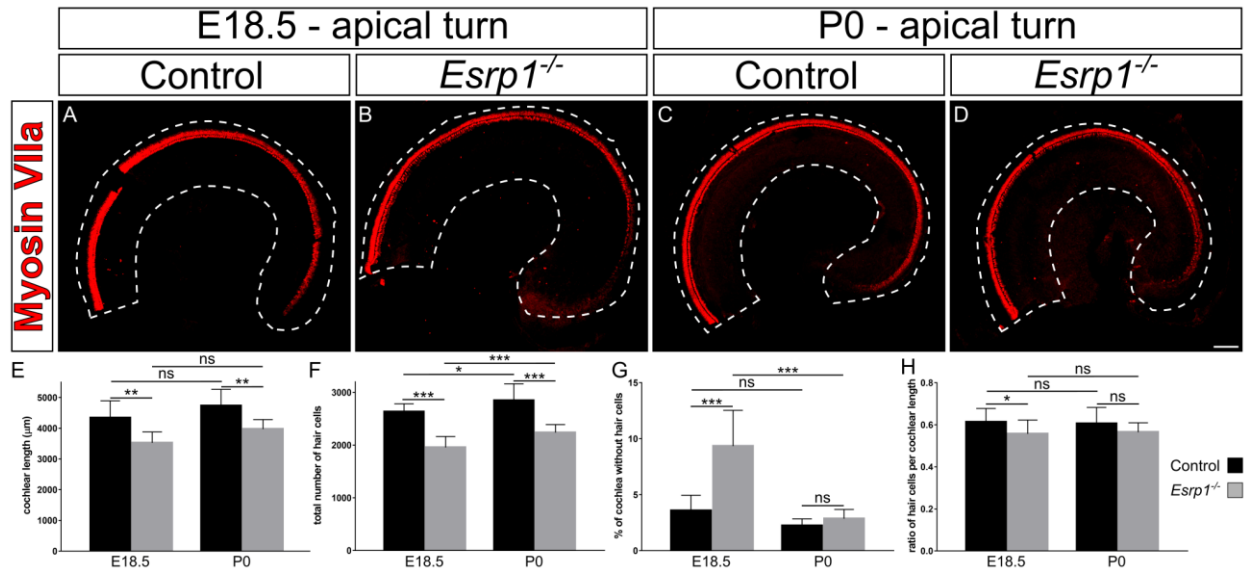

**Figure S3. (Related to Figure 3) Hair cell differentiation is delayed at the apex of the cochlear duct in *Esrp1*<sup>-/-</sup> mutants.** (A-D) Whole mount cochlear preparations from control and *Esrp1*<sup>-/-</sup> embryos immunostained for Myosin VIIa at E18.5 (A-B) and P0 (C-D). Scale bar = 100µm. (E-F) Quantification of cochlear length (E), total number of hair cells (F), percent of cochlea without hair cells (G), and ratio of hair cells per cochlear length (H) presented as mean ± SD (\*P<0.05; \*\*\*P<0.0001, one-way ANOVA with Tukey's test, n=10).

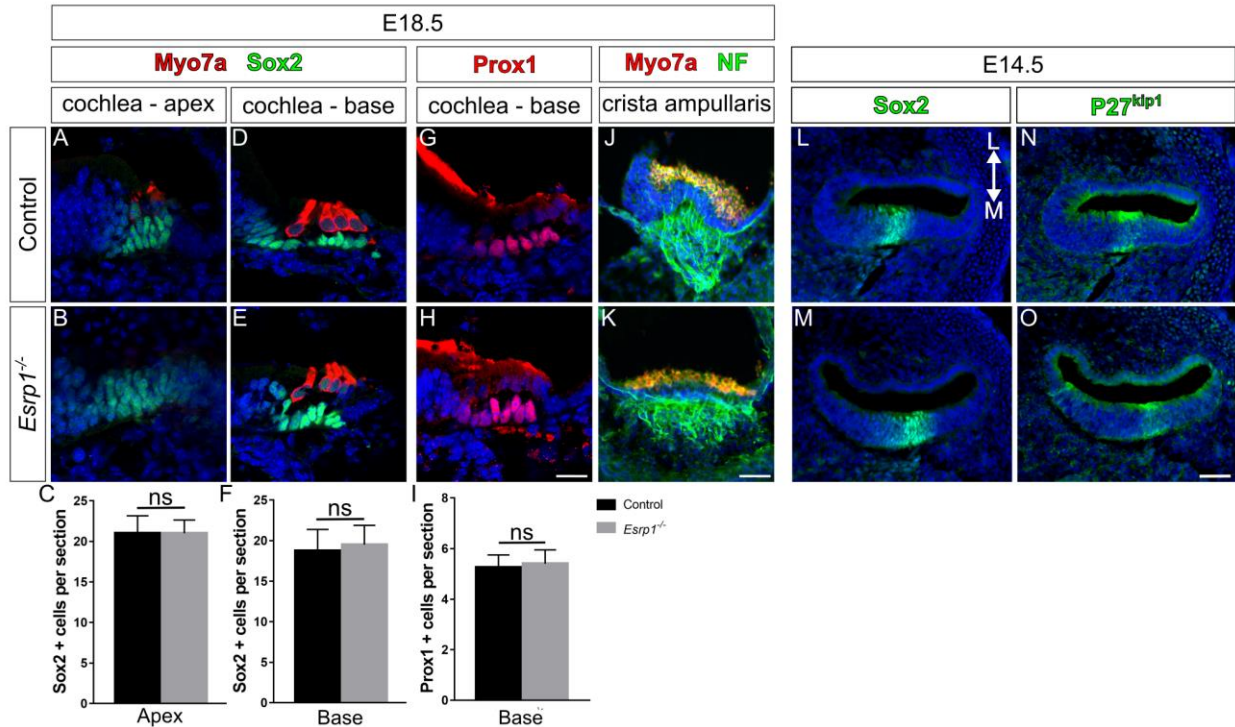

**Figure S4. (Related to Figures 2 and 4) Specification of prosensory progenitors, support cells, vestibular hair cells and neurons is not compromised in *Esrp1*<sup>-/-</sup> embryos.** (A-C) Sox2 staining reveals a normal pool of sensory progenitors at the apex of the cochlear duct of *Esrp1* mutants. (D-F) Sox2 and (G-I) Prox1 positive support cells are present in similar number and organization at the base of *Esrp1* mutants. Myo7a labels hair cells. All quantifications are presented as mean ± SD (ns, unpaired t-test). (J,K) Vestibular hair cells and neurons labeled with Myo7a and neurofilament (NF), respectively, are unaffected in *Esrp1* mutants. (L-O) The expression of Sox2 and P27<sup>kip1</sup> in prosensory progenitors is not compromised in *Esrp1*<sup>-/-</sup> embryos. Scale bar = 10µm (A,B,D,E,G,H) and 50µm (J-O). n=5 for all panels. Abbreviations: L (lateral), M (medial).

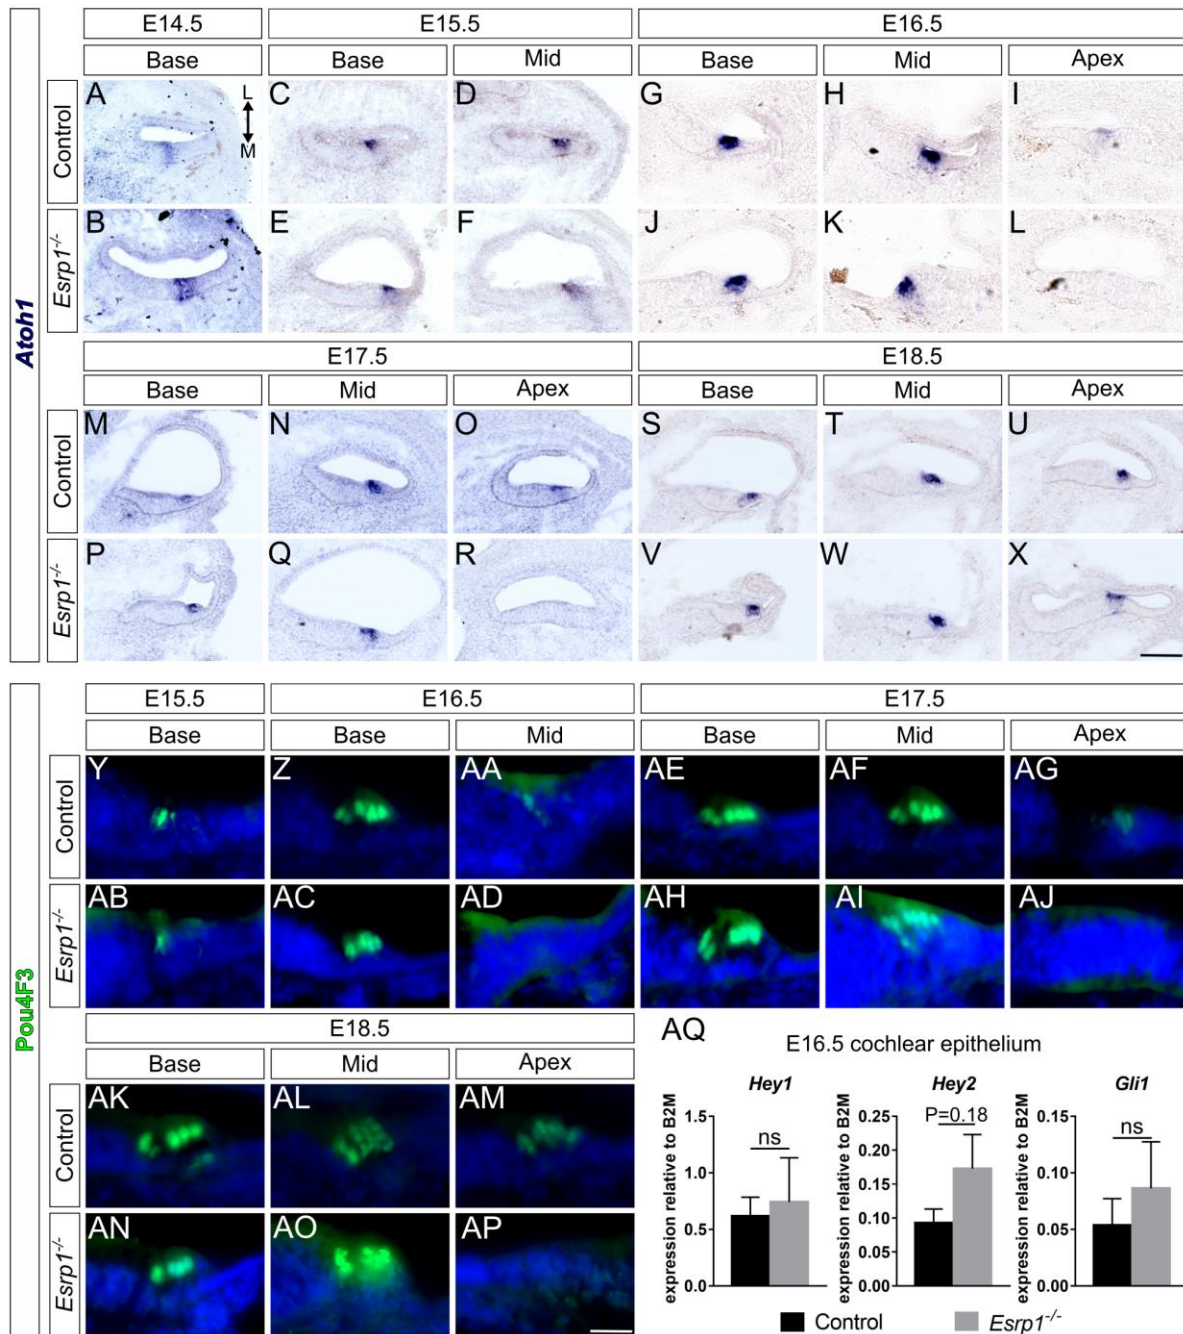

**Figure S5. (Related to Figure 4) Hair cell differentiation and maturation is delayed in *Esrp1*<sup>-/-</sup> embryos.** (A-X) Transverse sections through the cochlear duct of control and *Esrp1*<sup>-/-</sup> embryos stained for *Atoh1* mRNA at progressively later stages of hair cell development. (Y-AP) Transverse sections through the cochlear duct of control and *Esrp1*<sup>-/-</sup> embryos immunostained for Pou4F3 at progressively later stages of hair cell development. Scale bar = 100µm (A-X) and 10µm (Y-AP). (AQ) qRT-PCR of sensory markers on E16.5 cochlear epithelium represented as mean ± SD (ns, unpaired t-test). (A-AP) n=5, (AQ) n=6. Abbreviations: L (lateral), M (medial).

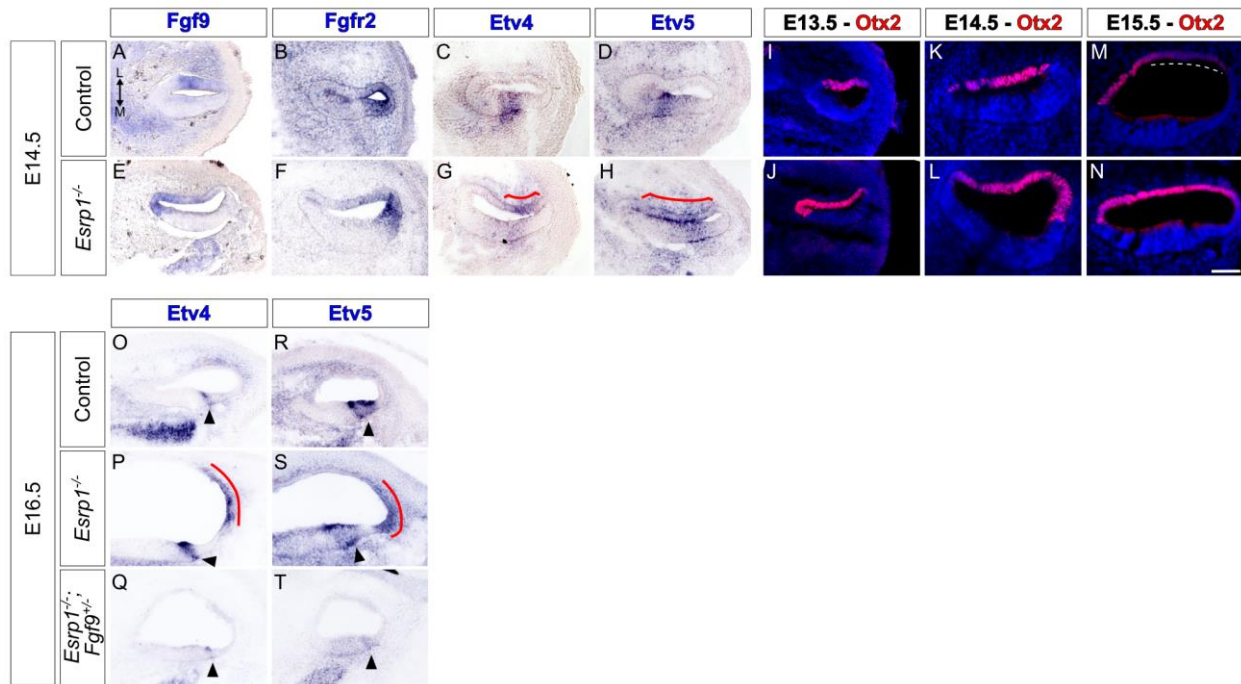

**Figure S6. (Related to Figures 5 and 7) Fgf signaling is ectopically activated in the lateral cochlear epithelium of *Esrp1* mutants.** (A-H) Transverse sections through the cochlear duct of control and *Esrp1*<sup>-/-</sup> mutants at E14.5 stained with markers of Fgf signaling. Ectopic expression of *Fgf9*, *Etv4* and *Etv5* along the lateral cochlear epithelium is highlighted (red-bracket). (I-N) *Otx2* is progressively restricted to Reissner's membrane in control embryos but remains broadly expressed throughout the lateral cochlear epithelium in *Esrp1* mutants. *Otx2* repression from the stria vascularis is indicated (dashed line). (O-T) Transverse sections through the cochlear duct of control, *Esrp1*<sup>-/-</sup>, and *Esrp1*<sup>-/-</sup>;*Fgf9*<sup>+/-</sup> embryos at E16.5 stained for *Etv4* and *Etv5*. Ectopic expression of *Etv4* and *Etv5* along the lateral cochlear epithelium (red-bracket) and normal sensory expression (arrowhead) are highlighted. Scale bar = 50µm. n=4 for all panels. Abbreviations: L (lateral), M (medial).

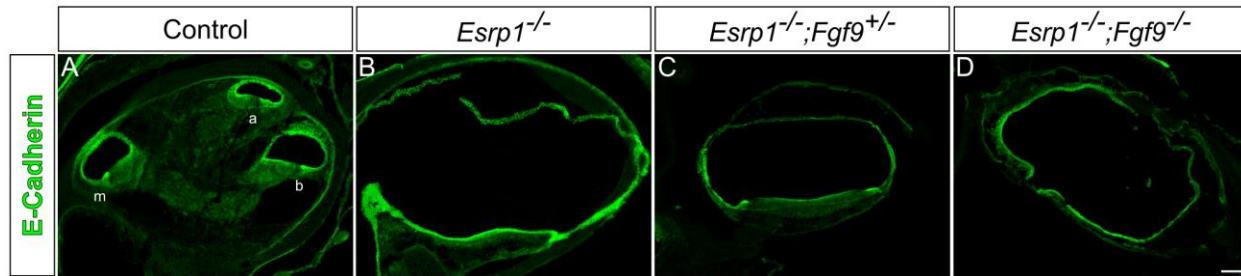

**Figure S7. (Related to Figures 2 and 7) The cystic otic phenotype in *Esrp1*<sup>-/-</sup> embryos is exacerbated by the dose dependent loss of *Fgf9*.** (A-D) Transverse sections through the cochlear ducts of control (n=6), *Esrp1*<sup>-/-</sup> (n=4), *Esrp1*<sup>-/-</sup>;*Fgf9*<sup>+/-</sup> (n=4) and *Esrp1*<sup>-/-</sup>;*Fgf9*<sup>-/-</sup> (n=3) embryos at E18.5 immunostained for E-cadherin. Scale bar=100µm. Abbreviations: apical turn (a), basal turn (b), medial turn (m).



**Table S2. (Related to Figures 4, 5, S5, and S6) Expression values of selected genes from RNA-seq on E16.5 control and *Esrp1*<sup>-/-</sup> cochlear epithelium.**

| <b>Gene</b>   | <b>Control FPKM</b> | <b><i>Esrp1</i><sup>-/-</sup> FPKM</b> | <b>Fold Change</b> | <b>P-Value</b> |
|---------------|---------------------|----------------------------------------|--------------------|----------------|
| <i>Atoh1</i>  | 3.46 ± 0.59         | 2.43 ± 0.38                            | -0.596             | 0.040          |
| <i>Atp1a1</i> | 96.99 ± 19.03       | 81.56 ± 4.37                           | -0.334             | 0.089          |
| <i>Bsnd</i>   | 0.53 ± 0.14         | 0.01 ± 0.01                            | -5.029             | 8.513E-16      |
| <i>Cd44</i>   | 1.92 ± 0.18         | 1.37 ± 0.10                            | -0.570             | 0.014          |
| <i>Cldn11</i> | 13.24 ± 4.30        | 13.12 ± 2.44                           | -0.161             | 0.546          |
| <i>Esrrb</i>  | 10.61 ± 2.38        | 0.72 ± 0.33                            | -4.012             | 3.959E-40      |
| <i>Etv4</i>   | 6.32 ± 1.14         | 9.17 ± 1.78                            | 0.403              | 0.047          |
| <i>Etv5</i>   | 11.50 ± 1.01        | 11.81 ± 0.33                           | -0.048             | 0.758          |
| <i>Fgfr1</i>  | 17.18 ± 0.52        | 18.69 ± 0.65                           | 0.029              | 0.954          |
| <i>Fgfr2</i>  | 15.10 ± 2.02        | 12.43 ± 1.30                           | -0.343             | 0.076          |
| <i>Fgfr3</i>  | 6.55 ± 1.22         | 3.91 ± .054                            | -0.796             | 2.055E-04      |
| <i>Gjb2</i>   | 55.99 ± 9.04        | 39.31 ± 7.70                           | -0.547             | 0.012          |
| <i>Gli1</i>   | 1.92 ± 0.17         | 1.58 ± 0.24                            | -0.341             | 0.188          |
| <i>Hey1</i>   | 15.66 ± 1.85        | 13.05 ± 1.59                           | -0.318             | 0.096          |
| <i>Hey2</i>   | 7.27 ± 0.41         | 8.51 ± 1.14                            | 0.176              | 0.501          |
| <i>Kcne1</i>  | 1.52 ± 0.3          | 0.06 ± 0.03                            | -4.503             | 9.817E-24      |
| <i>Kcnq1</i>  | 1.72 ± 0.3          | 0.97 ± 0.38                            | -0.989             | 0.004          |
| <i>Myo7a</i>  | 2.29 ± 0.43         | 1.89 ± 0.76                            | -0.441             | 0.093          |
| <i>Otx2</i>   | 8.75 ± 2.75         | 18.29 ± 1.12                           | 0.995              | 9.071E-05      |
| <i>Pou4f3</i> | 5.89 ± 0.69         | 3.49 ± 1.11                            | -0.914             | 0.004          |
| <i>Prox1</i>  | 3.67 ± 0.18         | 2.02 ± 0.57                            | -0.876             | 0.001          |
| <i>Ptch1</i>  | 6.54 ± 0.68         | 6.18 ± 1.30                            | -0.128             | 0.492          |
| <i>Sox2</i>   | 19.14 ± 0.28        | 18.54 ± 2.95                           | -0.110             | 0.501          |

**Table S3. (Related to STAR Methods) PCR primers used to amplify human *ESRP1* and *ESRP2* exons.**

| <i>ESRP1</i> Primers |                                   |                                   |                      |
|----------------------|-----------------------------------|-----------------------------------|----------------------|
| <b>Exon</b>          | <b>Forward primer<br/>(5'-3')</b> | <b>Reverse Primer<br/>(5'-3')</b> | <b>Size<br/>(bp)</b> |
| Exon 1               | TAGCAGTAGCAAGGAAGGGG              | GGGTCCAGACTCACAAGTGG              | 396                  |
| Exon 2               | GAGAGCTTTGATTCTGCGTC              | ATGAAGAGAAGCAGCGACC               | 445                  |
| Exon 3               | AAGGGGAGCTACTTTGCAG               | AGAACAGAGAACTTGAATAAACC           | 279                  |
| Exon 4               | TAGGTTCTTAATTGTGAGAGAAAC          | ATTTTGGATAGGCCAATTTTATC           | 450                  |
| Exon 5-6             | GTTGAATGACTGACTGATGGG             | ATTAGCCAGGTATGGTAGCG              | 662                  |
| Exon 7-9             | AACTAGGCAGTTGTCTTGCAG             | AAAACCATTCATGACCCTATTC            | 686                  |
| Exon 10              | CATTGGCAGGACTTTTATCAC             | TGAGCAATGTAGGACTATTTTCAG          | 469                  |
| Exon 11              | GTATCATGCTTTCCCTGCTG              | CTTAGTGTGTAAGTACTGAGGATTACG       | 675                  |
| Exon 12              | TTGTCACTTTGCATGTTTTG              | AGGGGCACAGAAAGTTACG               | 369                  |
| Exon 13              | TGTGTAGATGGAACAGTGACTATG          | GAGCTCTTGCACTGGCTATC              | 334                  |
| Exon 14              | GCTCTGAGAAGTATAAGAAAGTTG          | ATCTGTTTCTTCCCTGGCTG              | 360                  |
| Exon 15              | TCTAAATGCCTATACTTTTGTGG           | TCTAAATGCCTTCAGAATCTTG            | 286                  |
| <i>ESRP2</i> Primers |                                   |                                   |                      |
| <b>Exon</b>          | <b>Forward primer<br/>(5'-3')</b> | <b>Reverse Primer<br/>(5'-3')</b> | <b>Size<br/>(bp)</b> |
| Exon 1-2             | GTAACCTCGCCTGGAGAGGG              | ACAAGAGCCCAGTCCTGC                | 844                  |
| Exon 3-4             | TTCCTCCTACCCTCACTTCC              | ATACTCAGACACATGTACCCACAG          | 475                  |
| Exon 5               | GGAGTAAACAGGATTAGTGCTTATG         | GAGCAATAGGCATTTGTCATC             | 217                  |
| Exon 5               | GTGTCTATGGAGGGGAGTTG              | TAGAGAAGGTCACAGTGGGG              | 265                  |
| Exon 6-8             | GCAGAACTTGGTGGGGAC                | TATACACCTGTGGGTACAGAGAGC          | 599                  |
| Exon 6-8             | TTTTGCAGAACTTGGTGG                | CACCTGTGGGTACAGAGAGC              | 599                  |
| Exon 9-10            | GGCCAATCTGAGTCAGGC                | GTAGGGCAGGGACACAGAG               | 612                  |
| Exon 11              | AGATGTACTGTTACTCCAGGGC            | TACCCCTAACACACACCCC               | 353                  |
| Exon 12              | GTGTGTGTTAGGGGTAAGGC              | TAGAAGGTAGGGGCTTACAACAG           | 331                  |
| Exon 13              | ATAGCGGGGACTCCTTTC                | TTCCCAGATTGGGACAG                 | 323                  |
| Exon14-15            | GGTCTCGGTCTAGGCCAC                | GTTGAGGGTGCTGGTCTTC               | 469                  |

**Table S4. (Related to STAR Methods) Primers used to quantify changes in alternative splicing and gene expression by RT-PCR.**

| Alternative Splicing Primers |                                     |                                      |
|------------------------------|-------------------------------------|--------------------------------------|
| Gene                         | Forward-Primer                      | Reverse-primer                       |
| <b>Mouse</b>                 |                                     |                                      |
| <i>Arhgef11</i>              | TCAAGCTCAGAACCAGCAGGAAGT            | TGCTCGATGGTGTGGAAGATCACA             |
| <i>Col11a2</i>               | GGACGGCCCTCAGACTCAGAAG              | GCCAGGGGGTCCAGCTAATCCAG              |
| <i>Col11a2</i>               | GCCGCCCTGTCCGCTTTCTC                | GGCCCTTGTCAACCCCACTACTG              |
| <i>Csnk1d</i>                | CTCACGGGCCGACAAGATACCT              | GAGCTCCCGGCGTTAACATTTTCAG            |
| <i>Ctnnd1</i>                | AACCTCGCTGGATTTGTCTTTC              | TGATCCTGGGGTCCGTTGAGTTTC             |
| <i>Dgkd</i>                  | CTAAACGCAGCCGTAGTGGTAAA             | TTTGTTAGAGACAGGAAGCCCAAT             |
| <i>Enah</i>                  | GCTGGGCGTGGGAATGGACCTCTT            | TTGCCAGCTCTTTTCTCATCTCAT             |
| <i>Epb4.1</i>                | TTAACATCAACGGGCAAGTC                | ATATCGGCATCTCCTGTGA                  |
| <i>Eya4</i>                  | GAGGTGCTTTCCCCATTG                  | ATTTTCATCCGTTAAGACCATT               |
| <i>Eya4</i>                  | TCCCCATTGAGAACATTTACAG              | AGAGGTCCGAGTGGCTTGATA                |
| <i>Fgfr1</i>                 | CCTGGGCAGCAATGTGGAGTT               | AAGGCCCCGGTGCAGTAGATA                |
| <i>Fgfr2</i>                 | CCCGGGTCTAGATTTATAGTGATGC<br>CCAGCC | CCCGGGGAATTCACCACCATGCAGG<br>CGATTAA |
| <i>Fgfr3</i>                 | TGCCGGCCAACCAGACAGC                 | GCGCAGGCGGCAGAGTATCACA               |
| <i>Flnb</i>                  | GGCGAGGAGGTGGGCTTTGTAG              | CCTGACGGCAAATGGAATCACCAA             |
| <i>Ganab</i>                 | GCCCGGCTTTCTGTCTCTGGTC              | CATCCCTGGGTGTTTCCTCA                 |
| <i>Limch1</i>                | AGAGCCTGAAGCAACCCTGACG              | TCGCCGGCGCTCCTCTTCT                  |
| <i>Lsm14b</i>                | CCTCGGCGACACAGCTCAATGGT             | ATCACAGCTGGGTCCTTCTCTTCC             |
| <i>Map3k7</i>                | TTCCTGCCACAAACGACAC                 | ATTCTGACACTAGGGCTGGATGAC             |
| <i>Nf2</i>                   | TGACTTCAAGGATACGGACAT               | CAAACAAGCCAGCCCTCTACT                |
| <i>Ocri</i>                  | TGAACTCCGGTGAAGATAAGATTG            | GAAGGGGTCGCTCACTGGTA                 |
| <i>Phactr4</i>               | TGGAAGCAGGGGACACAACAC               | GGGCTAGAGGACCTGGCACTG                |
| <i>Ralgps2</i>               | ACCTGCTGGATGATAGTGTC                | CTTCAGAGATTTGGCGGCATAGTA             |
| <i>Scrib</i>                 | ATCCGCAAAGACACGCCCCACTAC            | AGCCTTTTCCCCCTGCGATACTGA             |
| <i>Sec22c</i>                | CAGCCCTGGGTGTCCTCTC                 | CCAGCATCAGCAGCACCTTCA                |

| <b>Human</b>              |                           |                                 |
|---------------------------|---------------------------|---------------------------------|
| <i>ARHGEF11</i>           | GAAATTCTGGGATATGGGAGTC    | GCCTGTTGAGCTTGAGAGTGA           |
| <i>ENAH</i>               | TGCTGGCCAGGAGGAGAAGA      | ACTGGGCTGTGATAAGGGTGT           |
| <i>NF2</i>                | TGGCAGCAGCAAGCACA         | CCCGGTAGCAGGAGAAGT              |
| <i>RALGPS</i>             | AGACCTCATGGCCTGCTTTTG     | TGTAGGCTTTTTGCCTTCTTT           |
| <b>SYBR Green Primers</b> |                           |                                 |
| <i>hβACTIN</i>            | AGGCACCAGGGCGTGAT         | GCCCACATAGGAATCCTTCTGAC         |
| <i>hESRP1</i>             | TGATCTTCGAAAAGAATTCAAGAAA | CGAGAGACTGAACTACTCTTCTCAA<br>AA |
| <i>hESRP2</i>             | CCCTACATGCTCTGCACTGA      | GGAATTCTCTTCGGAGGTCA            |
| <i>mB2M</i>               | TCTCTCTTTCTGGCCTGGAG      | AATGTCGGATGGATGAAACC            |
| <i>mAtoh1</i>             | ATGCACGGGCTGAACCA         | TCGTTGTTGAAGGACGGGATA           |
| <i>mGli1</i>              | GGAAGTCCTATTCACGCCTTGA    | CAACCTTCTTGCTCACACATGTAA        |
| <i>mHey1</i>              | CACTGCAGGAGGGAAAGGTTA     | CCCCAACTCCGATAGTCCAT            |
| <i>mHey2</i>              | AAGCGCCCTTGTGAGGAAA       | TCGCTCCCCACGTCGAT               |
| <i>mPtch1</i>             | CTGGCTCTGATGACCGTTGA      | GCACTCAGCTTGATCCCAATG           |
